# Supplementary material for: Dynamic patterning of microparticles with acoustic impulse control
Source: PubMed Central journal article supplement (PMC9411184; doi:10.1038/s41598-022-18554-5), 2022-08-25
Supplement: 41598_2022_18554_MOESM7_ESM.pdf [file 41598_2022_18554_MOESM7_ESM.pdf]

# Supplementary Videos Information

| <b>Supplementary Video Number</b> | <b>File Name</b>                            | <b>Length (mm:ss)</b> |
|-----------------------------------|---------------------------------------------|-----------------------|
| 1                                 | Supplementary Video 1 Tools Table           | 01:23                 |
| 2                                 | Supplementary Video 2 Single Line Forming   | 00:34                 |
| 3                                 | Supplementary Video 3 Circle Forming        | 00:22                 |
| 4                                 | Supplementary Video 4 Line Manipulation     | 01:47                 |
| 5                                 | Supplementary Video 6 Simulated ABC Forming | 02:09                 |
